# Supplementary material for: Facile preparation of large-scale expanded graphite/polydimethylsiloxane composites for highly-efficient electromagnetic interference shielding
Source: Royal Society of Chemistry journal article supplement (doi:10.1039/d2ta06263a), 2022-01-01
Supplement: d2ta06263a1.pdf [file d2ta06263a1.pdf]

## Supporting Information

### Facile preparation of large-scale expanded graphite/polydimethylsiloxane composites for Highly-efficient electromagnetic interference shielding

Fei Zhang,<sup>a,b,c</sup> Chuanbing Li,<sup>a</sup> Yinhang Zhang,<sup>a</sup> Yuxuan Sun,<sup>a</sup> Xuming Yao,<sup>d</sup> Lei Guo,<sup>a</sup>  
Jinyi Wu,<sup>a</sup> Kun Dai,<sup>a</sup> Jiatai Wu,<sup>a</sup> Qinbing Zheng<sup>\*a</sup>

<sup>a</sup> School of Science and Engineering, The Chinese University of Hong Kong, Shenzhen, Shenzhen, Guangdong, 518172, P.R. China. E-mail: [zhengqingbin@cuhk.edu.cn](mailto:zhengqingbin@cuhk.edu.cn) (Q. B. Zheng)

<sup>b</sup> Institute of Flexible Electronics Technology of THU, Jiaxing, Zhejiang, 314000, China

<sup>c</sup> School of Aerospace Engineering, Tsinghua University, Beijing, 100084 China

<sup>d</sup> Shaanxi Engineering Research Center for Digital Manufacturing Technology, Northwestern Polytechnical University, Xi'an 710072, PR China

**Table S1.** The density of the HOGF (initial density 67.6 mg cm<sup>-3</sup>) after different compressive strains.

| Compressive strain | The thickness under compressive load | The thickness after load removal | The density after load removal |
|--------------------|--------------------------------------|----------------------------------|--------------------------------|
| 0%                 | 20.6 mm                              | /                                | 67.6 mg cm <sup>-3</sup>       |
| 10%                | 18.5 mm                              | 19.3 mm                          | 72.2 mg cm <sup>-3</sup>       |

|     |         |         |                           |
|-----|---------|---------|---------------------------|
| 20% | 16.5 mm | 18.1 mm | 76.9 mg cm <sup>-3</sup>  |
| 30% | 14.4 mm | 16.3 mm | 85.4 mg cm <sup>-3</sup>  |
| 40% | 12.4 mm | 14.1 mm | 98.8 mg cm <sup>-3</sup>  |
| 50% | 10.3 mm | 11.5 mm | 121.1 mg cm <sup>-3</sup> |
| 60% | 8.2 mm  | 9.8 mm  | 142.1 mg cm <sup>-3</sup> |
| 70% | 6.2 mm  | 7.9 mm  | 176.3 mg cm <sup>-3</sup> |
| 80% | 4.1 mm  | 5.6 mm  | 248.7 mg cm <sup>-3</sup> |
| 90% | 2.1 mm  | 3.4 mm  | 409.6 mg cm <sup>-3</sup> |

**Table S2.** The parameters of the HOGF/PDMS composites with different HOGF contents.

| <b>Samples</b> | <b>Density of HOGF<br/>(mg cm<sup>-3</sup>)</b> | <b>Density of composite<br/>(mg cm<sup>-3</sup>)</b> | <b>Mass fraction<br/>(wt%)</b> |
|----------------|-------------------------------------------------|------------------------------------------------------|--------------------------------|
| HOGF/PDMS-1    | 65.3                                            | 997.1                                                | 6.55                           |
| HOGF/PDMS-2    | 95.3                                            | 991.3                                                | 9.61                           |
| HOGF/PDMS-3    | 148.1                                           | 982.8                                                | 15.07                          |
| HOGF/PDMS-4    | 207.6                                           | 967.4                                                | 21.46                          |

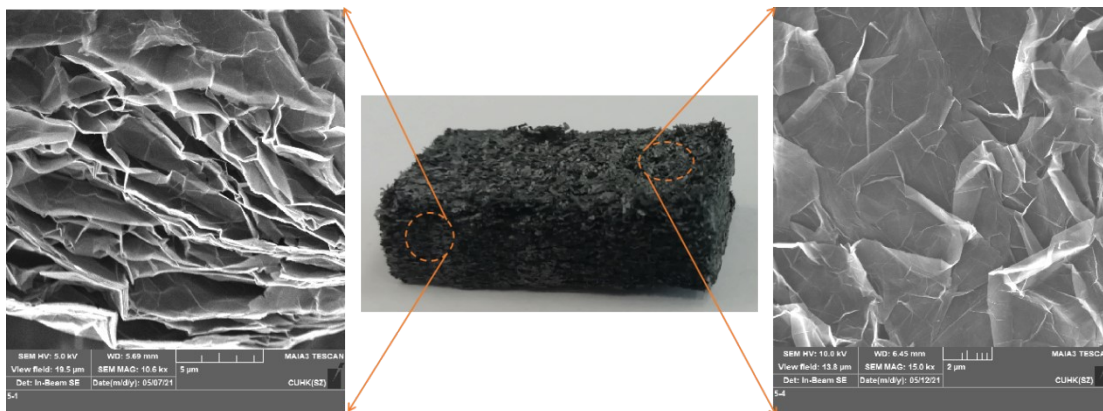

**Fig. S1.** The cross-sectional and top view scanning electron microscopy (SEM) images of HOGF.

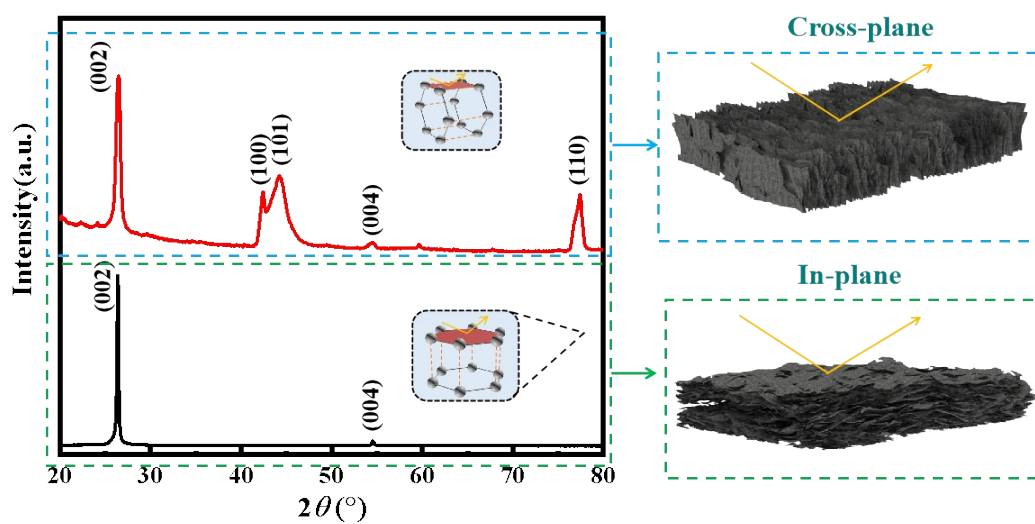

**Fig. S2.** Comparison the XRD profiles of HOGF in cross-plane and in-plane.

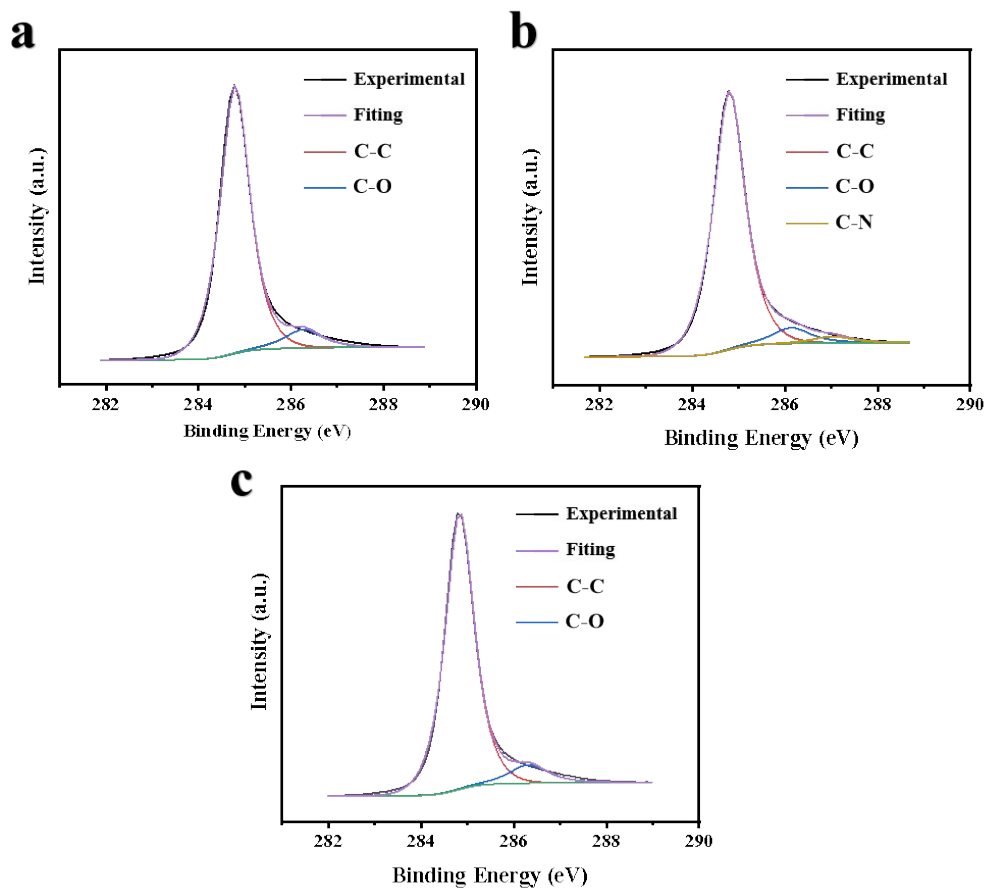

**Fig. S3.** Curve fitting of the C1 s spectra of the HOGF, PDMS and HOGF/PDMS composites.

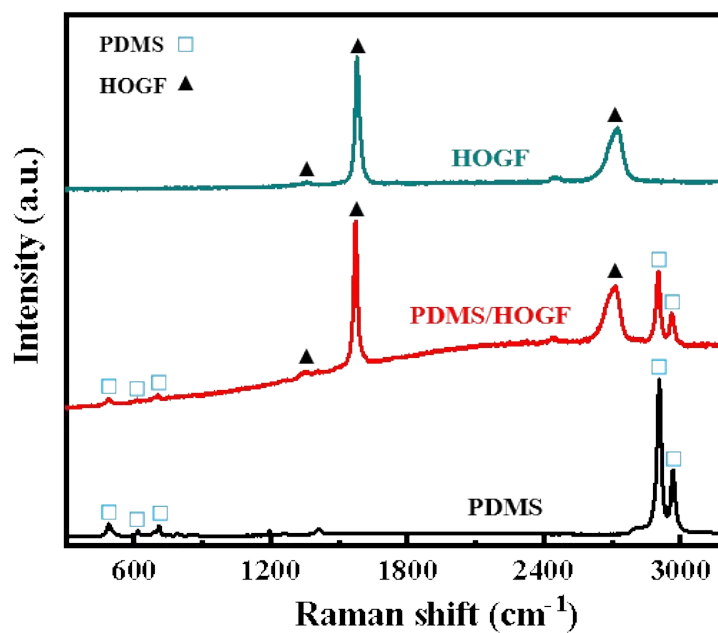

**Fig. S4.** Comparison of the Raman spectra of the PDMS, HOGF and HOGF/PDMS composites.

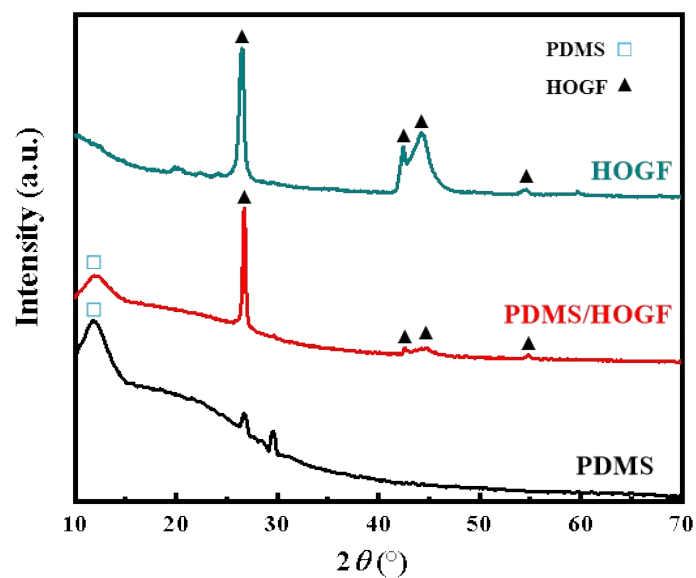

**Fig. S5.** Comparison of the XRD spectra of the PDMS, HOGF and HOGF/PDMS composites.

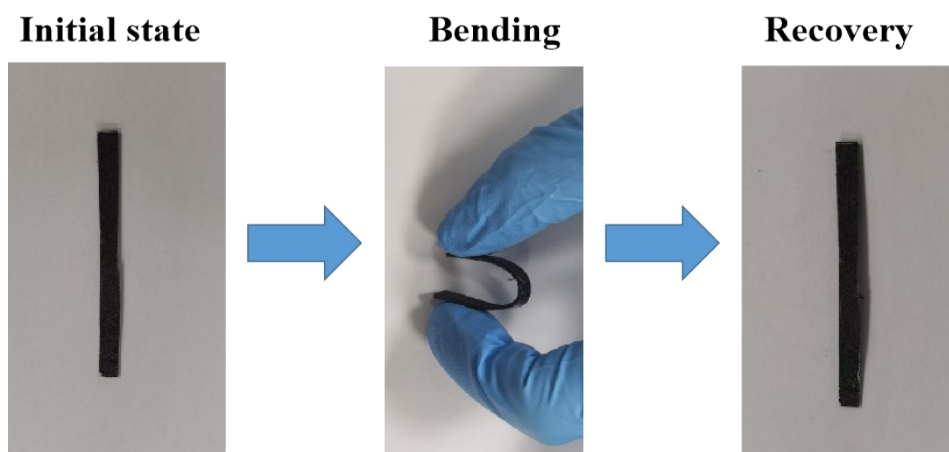

Fig. S6. The flexibility of the HOGF/PDMS composites under bending.

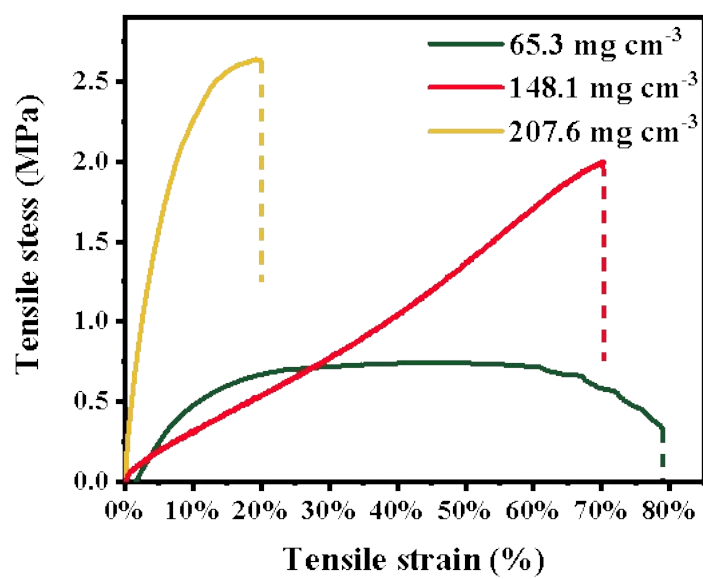

Fig. S7 The tensile stress-strain curves of the HOGF/PDMS composites.

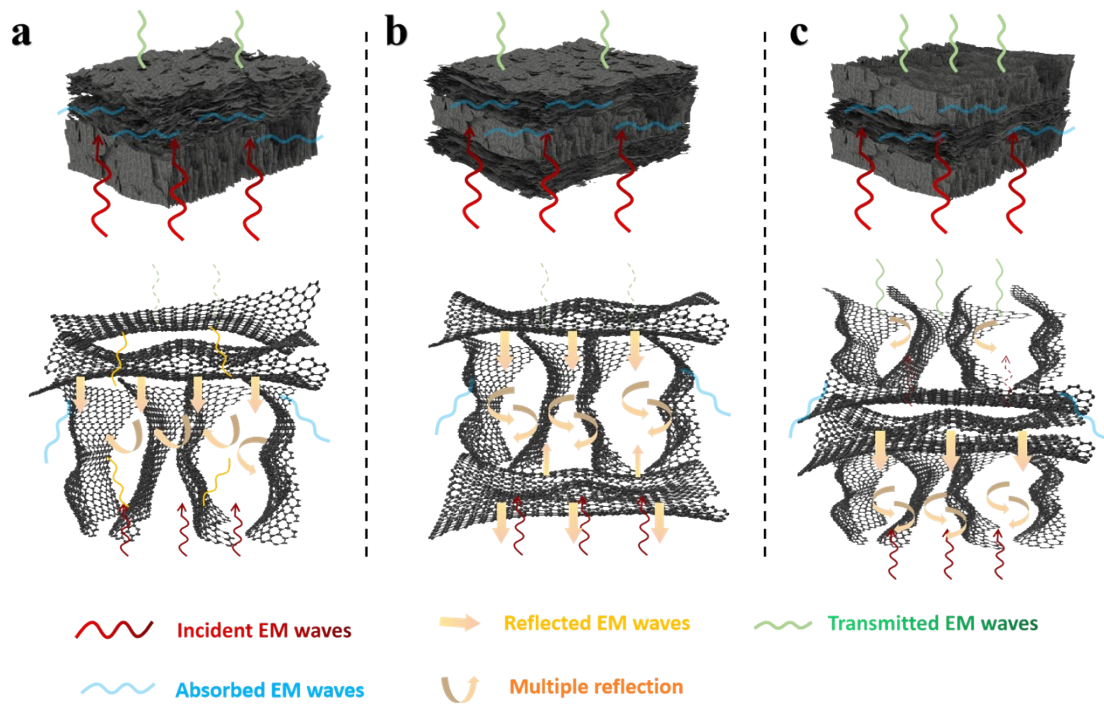

**Fig. S8** Schematic diagram of EMI shielding mechanism analysis of HOGF/PDMS with different combined structures: (a) P-V; (b) P-V-P; (c) V-P-V.

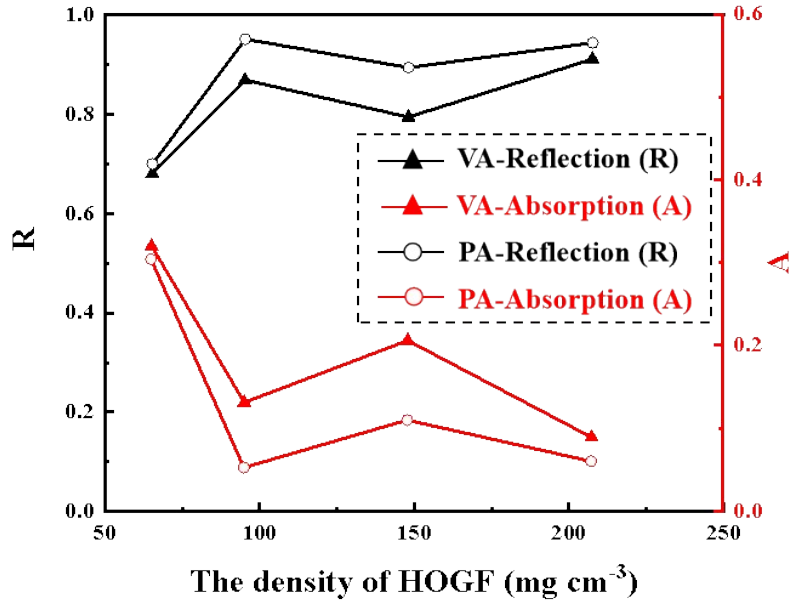

**Fig. S9** Average reflection (R) and absorption (A) of the HOGF/PDMS composites with different HOGF density networks (same thickness 5 mm).

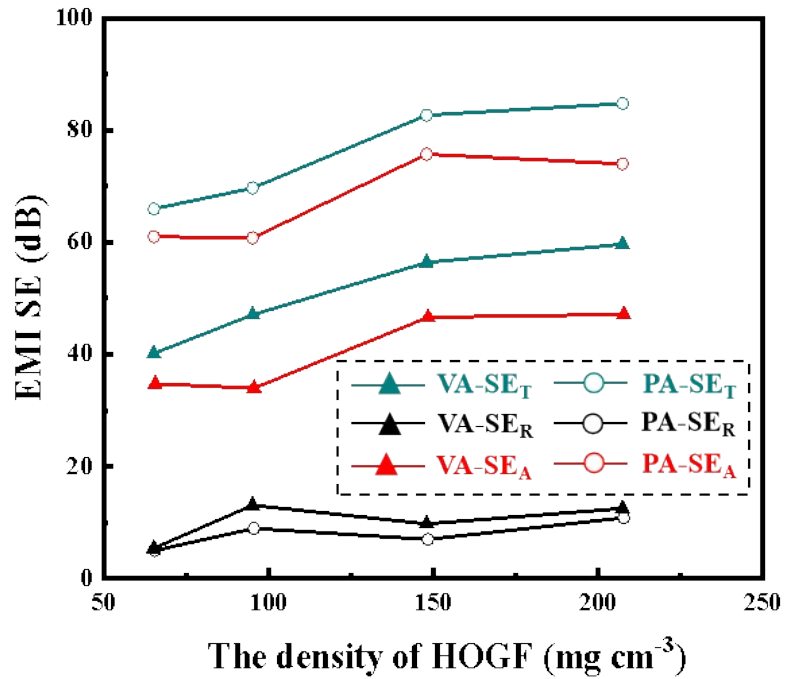

**Fig. S10** Average SE<sub>T</sub>, SE<sub>R</sub> and SE<sub>A</sub> of the HOGF/PDMS composites with different HOGF density networks (same thickness 5 mm).
